# Supplementary material for: Hepatocyte ABCA1 deficiency is associated with reduced HDL sphingolipids
Source: Frontiers journal article supplement (doi:10.3389/fphys.2023.1208719), 2023-08-04
Supplement: Image_1.pdf [file Image_1.pdf]

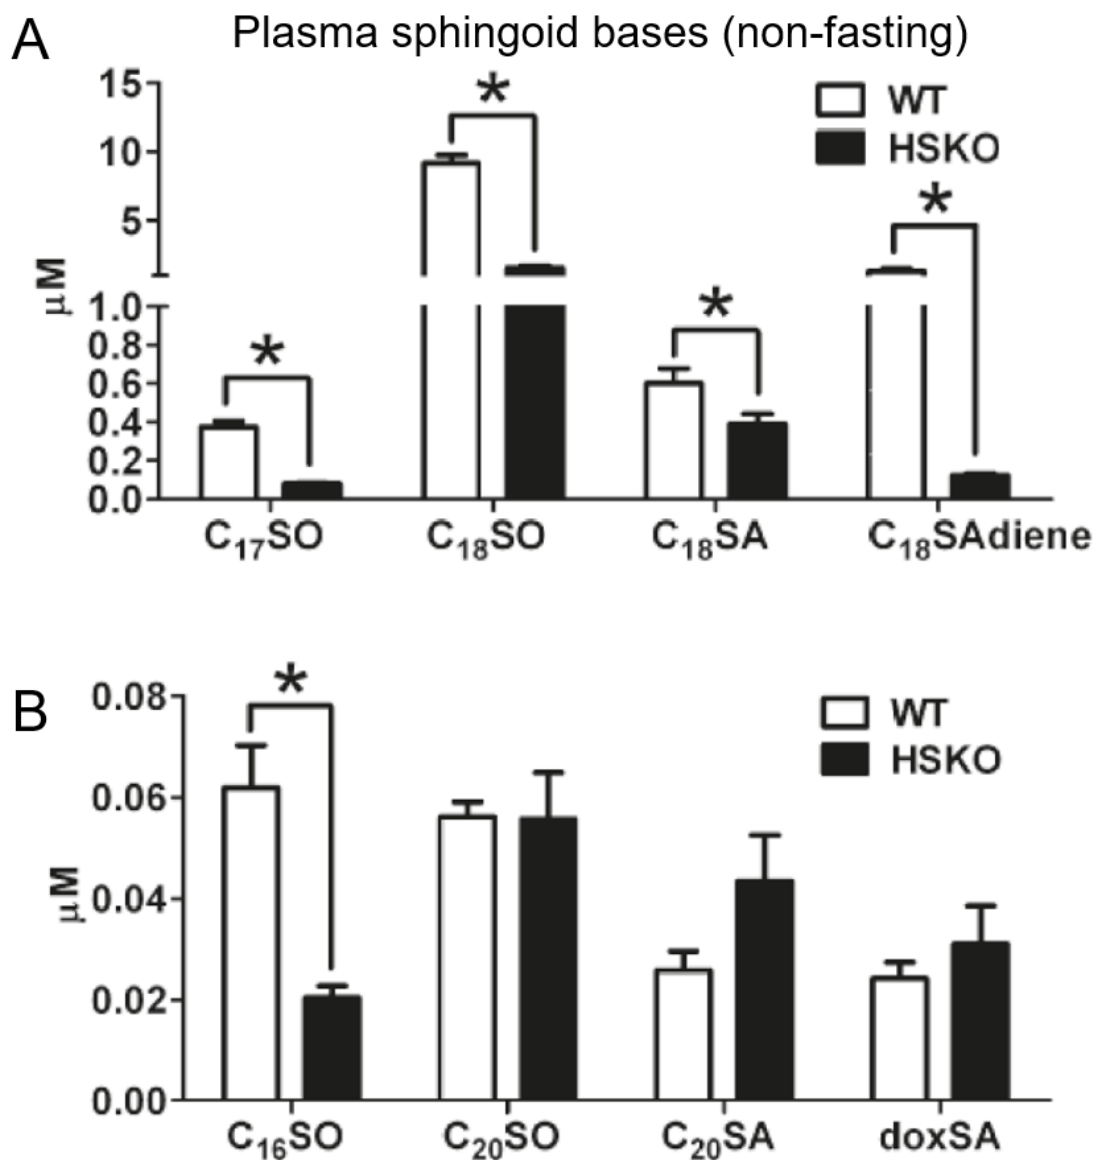

**Supplemental Figure 1. Decreased plasma sphingolipid concentrations in non-fasted Abca1 HSKO mice**

Plasma sphingoid base profile in non-fasting WT and Abca1 HSKO mice (**A**) C<sub>17</sub>SO, C<sub>18</sub>SO, C<sub>18</sub>SA and C<sub>18</sub>SA diene and (**B**) C<sub>16</sub>SO, C<sub>19</sub>SO, C<sub>20</sub>SO, C<sub>20</sub>SA and doxSA were quantified. Data are presented as mean ± SEM. WT (n=7) HSKO (n=9), Student t test, \*p < 0.05, \*\* p<0.01
